# Supplementary material for: Immunosuppressive and angiogenic cytokine profile associated with Bartonella bacilliformis infection in post-outbreak and endemic areas of Carrion's disease in Peru
Source: PLoS Negl Trop Dis. 2017 Jun 19;11(6):e0005684. doi: 10.1371/journal.pntd.0005684 (PMC5491314; doi:10.1371/journal.pntd.0005684)
Supplement: S1 Dataset — (XLSX) [file pntd.0005684.s001.xlsx]

## Sheet: basedades_cytokine_finalok.csv
Sample ID	IgM net	IgM status	IgG net	IgG status	RESULT rtPCR	bacteremia	Age	Age group	Gender	Locality	FGF	IL1B	GCSF	IL10	IL13	IL6	IL12	RANTES	EOTAXIN	IL17	MIP1A	GMCSF	MIP1B	MCP1	IL15	EGF	IL5	HGF	VEGF	IFNg	IFNa	IL1RA	TNFa	IL2	IL7	IP10	IL2R	MIG	IL4	IL8	TGFb
485	0.325	n	0.207333	n	negative	0	5	1	M	Los Ranchos	0.0526428	0.134277	139.655	3.88677	34.2458	1.52015	334.775	23400	36.7402	0.33493	37.1536	0.270081	60.8581	281.336	0.387573	0.0816345	0.0778198	232.859	0.0816345	27.828	36.7989	84.7825	1.7952	1.33516	0.0961304	33.2717	287.927	117.64	4.69831	38.1929	3.1574
1	0.312	n	0.366	n	negative	0	6	1	M	Guayaquil	0.0526428	0.134277	139.655	5.99212	26.7074	2.44808	431.44	23400	56.5564	0.33493	39.1961	0.270081	60.8581	611.75	6.2312	11.8473	0.696691	278.331	0.0816345	30.2609	34.2953	99.6043	1.596	2.28089	0.0961304	35.3892	220.812	174.317	3.75549	54.0627	3.05041
411	0.346	n	0.374	n	negative	0	6	1	H	Tunal	0.0526428	9.62839	139.655	8.10086	47.1388	4.12372	407.012	10980.3	16.5125	0.33493	45.0408	0.78756	110.353	303.052	51.8811	14.3075	5.36311	343.975	1.52351	31.8811	34.2953	178.555	1.596	3.79375	0.0961304	37.7122	309.897	875.818	3.28578	38.6021	3.47833
420	0.206	n	0.461	n	negative	0	6	1	M	Los Ranchos	27.2232	0.134277	139.655	5.14953	43.0787	3.7509	271.711	4093.8	39.9823	0.33493	41.1884	0.572474	67.7611	349.645	42.9256	19.9682	0.696691	322.39	0.0816345	22.9519	36.7989	127.484	2.39461	4.17193	0.0961304	32.9359	232.139	73.8083	5.64494	36.15	3.42173
19	0.319	n	0.204667	n	positive	0.82	6	1	M	Guayaquil	0.0526428	0.134277	133.498	1.7714	25.2651	1.18812	275.238	23400	42.2751	2.3546	38.0553	0.270081	106.811	283.205	28.5385	28.4898	1.41221	272.294	0.0816345	30.9725	35.6643	91.242	2.50636	2.09024	0.0961304	7.95178	227.569	44.0595	5.99514	20.7887	2.93962
132	0.364	p	0.28	n	positive	19.87	6	1	M	Mayland	0.0526428	0.134277	133.498	9.26545	22.7604	0.860241	345.322	23400	56.5268	0.33493	34.3116	1.5014	58.5733	443.427	0.387573	23.5472	1.0097	188.852	0.0816345	30.9725	30.6684	67.285	2.07723	1.56272	0.0961304	25.5624	291.729	53.0806	4.26781	34.5722	2.93064
416	0.271	n	0.212333	n	negative	0	7	1	H	Tunal	0.0526428	0.134277	115.478	18.2571	36.5609	5.15006	307.359	9247.01	25.8752	0.33493	39.1961	3.71501	36.4124	376.385	15.6182	11.8473	4.01412	185.569	0.0816345	30.2609	34.2953	92.2816	1.596	2.65914	21.4133	12.1701	209.419	143.819	4.69831	42.2922	2.4877
98	0.263	n	0.317667	n	positive	0.01	7	1	H	Mayland	0.0526428	0.134277	133.498	12.224	42.2353	1.10577	278.892	23400	69.8183	1.47918	38.0553	2.19466	121.279	635.787	0.387573	41.2879	0.603954	188.852	0.0816345	30.9725	35.6643	35.524	2.07723	2.26652	0.0961304	8.60058	205.822	44.0595	5.99514	34.5722	2.97513
28	0.477	p	0.194333	n	positive	7.71	7	1	H	Tunal	0.0526428	0.134277	93.0965	2.56107	10.7127	1.35349	244.026	23400	44.3102	1.47918	32.375	0.270081	45.7062	234.264	0.387573	8.4039	1.81247	155.861	0.0816345	29.2576	30.6684	198.953	1.65155	0.689598	0.0961304	23.5604	150.43	92.3772	3.41331	33.2127	1.73977
2	0.224	n	0.533667	p	positive	16.55	7	1	H	Guayaquil	26.727	32.6531	152.776	2.16632	42.2353	10.3572	374.009	23400	94.4425	2.3546	36.2036	0.577658	103.596	663.995	135.688	58.8355	53.3591	658.729	3.67959	29.2576	35.6643	180.352	2.07723	10.6666	0.0961304	15.4533	194.868	86.803	5.99514	29.1572	3.18729
43	0.352	p	0.397667	n	positive	10.77	8	1	H	Mayland	0.0526428	0.134277	189.999	361.282	42.2353	2.61509	275.238	23400	44.82	2.78473	48.488	104.751	92.3415	377.854	40.7051	181.451	1.41221	417.627	8.08195	33.5477	42.6325	141.317	3.80963	3.15048	0.0961304	18.9551	259.835	225.152	6.43014	24.9492	4.77928
4	0.671	p	0.165667	n	positive	25.24	8	1	M	Guayaquil	0.0526428	0.134277	133.498	7.68808	10.7127	3.64335	258.136	5948.63	22.5704	2.3546	34.3116	0.577658	68.2224	329.247	26.5089	85.1608	0.603954	210.258	2.16782	36.1262	33.2077	344.58	2.2914	2.79642	0.0961304	3.638	194.868	0.0587463	5.12876	21.5413	3.31209
24	0.475	p	0.210333	n	negative	0	9	1	H	Guayaquil	0.0526428	0.134277	133.498	2.56107	36.3476	0.53737	318.873	23400	42.2751	2.3546	34.3116	0.270081	127.709	383.826	0.387573	79.3077	1.41221	262.151	0.0816345	33.5477	28.0332	30.3801	2.07723	1.73832	0.0961304	7.61876	216.721	83.9143	5.12876	15.9443	3.64585
426	0.43	p	0.297333	n	negative	0	9	1	M	Los Ranchos	0.0526428	0.134277	139.655	1.99587	38.7991	0.075531	326.875	5465.03	43.7149	0.33493	37.1536	0.270081	98.5083	396.25	0.387573	22.5177	0.949646	322.39	0.0816345	22.9519	36.7989	208.313	1.596	2.47002	0.0961304	26.0189	265.77	103.4	5.64494	81.925	3.207
457	0.38	p	0.313333	n	negative	0	9	1	H	Huancabamba	11.3613	21.9859	223.256	3.04581	34.2458	2.54101	516.389	8677.45	63.2173	0.33493	50.541	0.572474	175.531	443.885	42.9256	239.511	0.696691	458.521	0.0816345	31.8811	43.8819	202.467	3.19713	4.55009	0.0961304	20.7812	254.615	105.493	9.4595	52.6108	3.9884
12	0.389	p	0.238667	n	positive	1.11	9	1	H	Guayaquil	0.0526428	0.134277	162.235	1.7714	34.2788	1.51968	345.921	23400	42.2117	3.21101	38.9671	0.270081	71.4386	385.813	0.387573	17.7094	1.41221	155.861	0.335266	32.689	42.6325	83.4836	2.50636	2.09024	0.0961304	13.3122	238.369	44.0595	6.86623	24.5689	2.78213
463	0.351	p	0.485667	n	positive	10.91	9	1	M	Huancabamba	0.0526428	0.134277	193.696	3.4662	52.8974	1.89098	437.381	11500.2	66.0468	0.33493	44.093	0.572474	166.408	984.835	29.3758	322.051	1.19805	936.517	0.0816345	29.4502	39.2255	291.15	2.79545	3.03736	0.0961304	12.3838	276.873	92.5939	5.64494	93.7895	3.69611
401	0.577	p	0.349	n	negative	0	10	1	M	Tunal	0.0526428	0.134277	162.164	2.62565	54.742	3.47144	396.848	10768.5	48.6897	0.33493	39.1961	0.270081	78.0629	531.542	24.8187	18.6689	1.68511	458.521	0.0816345	25.3918	31.7034	301.639	1.596	2.28089	0.0961304	23.4279	133.421	92.5939	5.64494	62.5983	3.20147
487	0.289	n	0.486667	n	negative	0	10	1	H	Los Ranchos	0.0526428	0.134277	139.655	1.78608	58.3341	0.780425	408.206	23400	58.5396	9.67728	39.1961	0.270081	127.186	448.512	0.387573	72.3344	1.19805	343.975	0.0816345	30.2609	33.0112	106.771	1.99472	1.90262	0.0961304	32.8685	174.807	132.919	4.69831	48.8853	3.26056
421	0.612	p	0.371	n	negative	0	11	2	M	Los Ranchos	0.0526428	0.134277	139.655	15.7134	65.183	1.89098	293.881	3874.1	59.2438	0.33493	39.1961	2.24933	74.6355	730.04	10.9574	6.55394	4.91631	333.216	0.0816345	27.828	39.2255	166.241	1.99472	2.28089	0.0961304	33.7395	232.139	71.2934	6.59477	75.1778	3.43822
492	0.57	p	0.399	n	positive	0.179	11	2	M	Los Ranchos	0.0526428	0.134277	133.498	20.3206	61.1086	1.60305	331.515	23400	86.4431	1.47918	45.1233	3.64206	85.1063	580.3	0.387573	13.587	2.21101	251.936	0.0816345	38.7076	38.0487	127.62	2.07723	2.44298	0.0961304	40.0801	259.835	1450.37	5.99514	122.177	3.54711
406	0.311	n	0.238	n	negative	0	12	2	M	Tunal	0.0526428	0.134277	139.655	2.62565	23.9299	1.7055	246.272	23400	20.1724	0.33493	36.1117	0.572474	71.2016	219.675	10.9574	0.0816345	0.0778198	267.108	0.0816345	31.0712	34.2953	60.9288	1.596	1.90262	0.0961304	12.3305	186.422	32.2937	4.69831	22.4016	2.67046
44	0.513	p	0.267667	n	positive	0.07	12	2	M	Mayland	0.0526428	0.134277	143.201	2.56107	34.2788	1.77029	310.424	23400	63.1753	2.3546	41.6515	0.270081	40.8804	897.542	0.387573	165.374	1.41221	282.369	0.0816345	30.9725	38.0487	106.221	1.65155	2.79642	0.0961304	53.3456	211.278	228.159	5.56132	18.9153	3.13596
456	0.282	n	1.044	p	positive	0.21	12	2	H	Huancabamba	0.0526428	0.134277	925.019	1.37628	27.6521	1.10577	252.008	6660.16	40.7532	3.21101	39.8702	0.270081	114.849	475.854	0.387573	178.72	0.603954	360.826	0.0816345	30.9725	47.009	246.321	2.93839	1.73832	0.0961304	16.3569	172.783	180.078	38.7087	277.493	3.0224
52	0.375	p	0.615	p	positive	4.03	12	2	H	Huancabamba	0.0526428	0.134277	113.653	2.16632	47.7409	2.61509	283.76	23400	80.3939	2.3546	38.0553	0.270081	58.5733	600.122	0.387573	7.61391	1.0097	231.269	0.0816345	32.689	33.2077	75.5103	2.50636	1.73832	0.0961304	12.9565	194.868	44.0595	5.12876	34.9613	4.75577
462	0.298	n	0.490333	n	positive	307.1	12	2	H	Huancabamba	0.0526428	0.134277	113.653	54.5049	29.941	1.93817	320.078	23400	111.021	4.88717	39.8702	8.3663	158.248	871.232	0.387573	206.352	1.0097	491.239	0.847996	30.9725	38.0487	134.519	2.93839	2.09024	0.0961304	17.3992	238.369	549.197	6.86623	55.9464	3.04947
410	0.492	p	0.248	n	negative	0	13	2	M	Tunal	0.0526428	0.134277	139.655	5.36013	14.1817	1.33494	310.415	11217.5	16.4169	0.33493	45.0408	1.45137	106.974	180.982	24.8187	177.674	0.696691	244.379	0.0816345	28.6393	39.2255	1114.43	2.79545	0.767587	0.0961304	11.9544	232.139	39.4758	5.64494	35.3342	2.49604
490	0.464	p	0.43667	n	negative	0	13	2	M	Los Ranchos	0.0526428	0.134277	115.478	1.78608	53.824	1.1499	305.524	10275.5	51.2796	0.33493	43.1353	0.270081	66.0381	315.773	0.387573	45.5006	2.16266	185.569	0.0816345	26.2042	34.2953	113.798	1.99472	2.65914	0.0961304	23.6616	220.812	143.819	4.69831	59.2611	3.50569
47	0.382	p	0.628	p	negative	0	13	2	M	Huancabamba	0.0526428	0.134277	113.653	2.95572	25.2651	0.778982	291.656	23400	65.405	4.05417	39.8702	0.270081	47.3147	393.734	0.387573	82.0008	1.41221	262.151	0.0816345	30.1149	35.6643	75.5103	2.07723	1.38739	0.0961304	19.0315	216.721	334.616	5.99514	34.1834	3.70185
419	0.304	n	0.453	n	positive	35.44	13	2	M	Los Ranchos	0.0526428	0.134277	115.478	4.30753	52.8974	0.688213	261.809	23400	53.2145	0.33493	50.541	0.679521	50.4424	314.797	0.387573	5.7352	0.0778198	295.002	0.0816345	28.6393	36.7989	99.6043	1.19872	2.28089	0.0961304	19.948	243.406	96.989	4.69831	42.2922	3.22545
22	0.442	p	0.641667	p	positive	0.06	14	2	M	Guayaquil	0.0526428	0.134277	152.776	0.336456	27.6521	3.04188	256.911	23400	46.2242	3.21101	36.2036	0.270081	43.2933	550.275	0.387573	2.83365	0.603954	251.936	0.0816345	30.1149	35.6643	67.285	2.93839	1.38739	0.0961304	7.3364	227.569	0.0587463	5.12876	14.289	1.78768
409	0.296	n	0.217333	n	negative	0	15	2	M	Tunal	8.3497	2.74629	113.653	0.980869	0.292969	0.698058	249.554	23400	20.2557	1.47918	28.3465	0.270081	36.0543	180.487	26.5089	13.2324	1.0097	133.145	0.0816345	32.689	28.0332	167.639	2.07723	2.44298	0.0961304	5.59108	161.643	0.0587463	3.41331	16.6838	0.951294
31	0.367	p	0.370667	n	positive	0.13	15	2	M	Tunal	0.0526428	0.134277	71.5928	12.0267	22.7604	0.075531	243.411	23400	39.3616	0.33493	34.3116	4.57094	45.7062	292.754	0.387573	0.0816345	0.0778198	199.607	0.0816345	32.689	35.6643	19.1914	1.65155	1.38739	0.0961304	5.52688	139.138	0.0587463	3.41331	18.1694	2.07861
51	0.245	n	0.5	n	positive	34.48	15	2	H	Huancabamba	0.0526428	0.134277	133.498	0.980869	44.1081	1.18812	273.409	23400	73.8588	4.05417	43.4017	0.270081	81.0865	442.465	0.387573	89.0184	2.21101	454.707	1.05198	28.4008	40.3692	79.5258	2.93839	2.09024	0.0961304	10.6299	238.369	74.757	5.99514	22.6735	3.95041
45	0.47	p	0.552333	p	negative	0	16	2	H	Huancabamba	0.0526428	0.134277	113.653	1.7714	32.1462	0.698058	277.675	23400	74.3902	0.33493	38.0553	0.270081	103.596	371.859	0.387573	158.736	1.0097	341.533	0.0816345	31.8305	35.6643	67.285	2.07723	1.38739	0.0961304	6.69791	194.868	33.0734	4.69755	23.4304	2.79061
10	0.371	p	0.521333	n	positive	2.5	18	2	M	Guayaquil	0.0526428	0.134277	113.653	1.37628	17.2744	0.075531	322.488	23400	33.9534	2.78473	34.3116	0.270081	56.965	250.816	0.387573	9.93992	1.0097	241.643	0.0816345	31.8305	33.2077	134.519	2.07723	1.38739	0.0961304	13.9253	194.868	16.6888	4.26781	30.698	2.47687
97	0.462	p	0.650333	p	positive	3.32	18	2	M	Mayland	0.0526428	0.134277	133.498	18.3443	45.9423	32.235	222.438	23400	66.5882	8.14853	38.0553	1.96349	73.0466	436.684	0.387573	53.0344	1.41221	282.369	0.0816345	25.8328	38.0487	91.242	2.50636	1.73832	0.0961304	7.84145	270.505	60.9854	5.99514	23.4304	3.02646
362	0.178	n	0.346333	n	positive	8.85	19	2	M	Tunal	0.0526428	0.134277	139.655	1.78608	80.828	3.56458	342.054	7833.89	112.151	6.24504	46.9083	0.270081	210.193	587.865	33.9107	124.782	0.696691	606.325	6.28153	30.666	39.2255	269.826	2.79545	2.65914	0.0961304	43.0521	282.406	177.537	5.64494	129.969	4.3253
388	0.481	p	0.317	n	negative	0	20	2	M	Tunal	0.0526428	0.134277	152.776	23.8809	57.913	1.2707	299.537	23400	93.2173	4.05417	36.2036	5.21076	116.456	623.357	34.6238	103.673	1.41221	351.204	0.0816345	36.1262	33.2077	192.81	2.93839	1.56272	0.0961304	24.4657	312.809	121.804	6.86623	51.5387	3.52664
483	0.486	p	0.319333	n	negative	0	20	2	M	Los Ranchos	34.4754	51.5146	139.655	1.36677	49.0988	0.075531	272.947	23400	94.5317	0.33493	54.0529	0.270081	122.146	993.852	117.878	44.9525	0.696691	427.897	0.0816345	31.8811	39.2255	231.234	1.596	12.1118	0.0961304	9.91243	209.419	46.0473	5.64494	54.2702	3.61588
11	0.264	n	0.296667	n	positive	0.008	20	2	H	Guayaquil	0.0526428	0.134277	113.653	2.56107	64.2235	5.38211	301.959	23400	53.1612	4.05417	39.8702	0.270081	145.39	671.879	0.387573	37.6048	1.81247	509.317	6.08524	29.2576	35.6643	240.553	2.07723	1.03767	0.0961304	16.4381	259.835	68.1438	2.56676	37.302	4.06863
488	0.175	n	0.289	n	negative	0	26	3	H	Los Ranchos	0.0526428	0.134277	115.478	0.947881	56.5535	1.89098	266.764	23400	69.8329	6.24504	37.1536	0.270081	91.7143	462.349	10.9574	54.8982	0.696691	333.216	0.0816345	32.6908	36.7989	84.7825	1.99472	2.28089	0.0961304	25.5703	220.812	52.1742	4.69831	37.3752	2.96915
471	0.258	n	0.482333	n	negative	0	26	3	M	Los Ranchos	0.0526428	0.134277	115.478	1.78608	31.8423	3.56458	312.248	6857.01	76.8283	0.33493	41.1884	0.270081	53.9232	1258.35	15.6182	33.3859	0.696691	365.299	0.0816345	31.8811	36.7989	202.467	1.596	1.90262	0.0961304	57.5578	232.139	109.617	4.69831	53.0255	3.34728
467	0.54	p	0.455667	n	negative	0	27	3	M	Los Ranchos	0.0526428	0.134277	139.655	10.635	65.183	3.09905	292.653	23400	19.591	0.33493	37.1536	2.19169	71.2016	510.755	24.8187	37.9819	0.696691	283.909	0.0816345	29.8556	31.7034	190.622	2.39461	3.03736	0.0961304	16.0578	243.406	57.9564	6.59477	54.2702	2.94775
489	0.352	p	0.464	n	negative	0	27	3	M	Los Ranchos	0.0526428	0.134277	139.655	22.9275	82.3007	9.92314	334.168	23400	62.3216	0.33493	48.7409	2.65519	120.464	1079.31	0.387573	47.951	2.16266	738.103	2.5041	28.6393	36.7989	401.435	2.39461	2.84825	0.0961304	24.5479	276.873	39.4758	6.59477	63.016	4.3208
376	0.291	n	0.278	n	negative	0	28	3	M	Tunal	0.0526428	0.134277	133.498	2.16632	47.7409	6.96685	227.385	23400	49.4267	1.47918	41.6515	0.270081	151.819	570.332	38.6784	148.793	1.0097	545.126	1.05198	32.2597	36.8649	120.611	2.50636	1.73832	0.0961304	7.73045	194.868	107.806	5.99514	56.1473	3.62734
404	0.591	p	0.255667	n	positive	55.7	28	3	M	Tunal	41.5403	44.4057	115.478	1.36677	49.0988	3.37831	265.526	23400	15.7958	0.33493	39.1961	0.270081	39.9378	377.334	38.4265	19.9682	0.696691	343.975	0.0816345	23.7656	29.0087	159.983	2.39461	7.19695	0.0961304	12.8057	232.139	92.5939	3.75549	24.0042	2.86406
431	0.325	n	0.340667	n	negative	0	29	3	M	Los Ranchos	0.0526428	0.134277	183.436	31.4405	68.464	9.45436	264.287	23400	87.1744	0.33493	37.1536	4.85405	192.068	857.207	10.9574	26.8473	1.68511	417.595	0.0816345	33.5001	31.7034	178.555	1.99472	2.28089	0.0961304	20.2832	265.77	222.844	4.69831	73.0746	3.29313
460	0.197	n	1.11767	p	negative	0	29	3	M	Huancabamba	0.0526428	0.134277	133.498	1.37628	36.3476	3.81596	265.475	11200	64.8798	4.05417	50.1346	0.270081	68.2224	494.694	38.6784	199.145	1.41221	398.861	3.67959	36.9863	30.6684	174.029	6.46561	1.38739	0.0961304	8.70666	227.569	68.1438	5.99514	84.0806	3.5774
6	0.498	p	0.21	n	negative	0	30	3	M	Guayaquil	0.0526428	0.134277	57.9652	4.30753	29.3359	1.79822	207.992	2257.14	37.9033	0.33493	41.1884	0.270081	36.4124	303.052	6.2312	52.2479	2.16266	333.216	0.0816345	15.6058	26.1917	134.165	1.19872	0.767587	0.0961304	9.18238	96.7762	63.4604	1.88562	22.2016	2.72874
99	0.382	p	0.51	n	positive	88.34	30	3	H	Mayland	0.0526428	0.134277	113.653	1.37628	25.2651	0.457709	258.136	23400	131.542	3.21101	38.0553	0.270081	137.353	797.924	0.387573	45.7302	1.0097	282.369	0.0816345	35.6962	33.2077	113.482	2.07723	1.38739	0.0961304	19.9018	205.822	121.804	4.26781	43.591	2.60953
392	0.398	p	0.433667	n	negative	0	31	3	M	Tunal	0.0526428	0.134277	113.653	1.37628	17.2744	1.18812	258.748	23400	42.0212	3.21101	39.8702	0.270081	74.6547	347.655	0.387573	91.8898	0.603954	302.323	0.0816345	30.9725	30.6684	186.611	2.50636	1.38739	0.0961304	14.3565	238.369	158.48	4.26781	55.1432	2.43529
464	0.325	n	0.716	p	negative	0	31	3	M	Huancabamba	0.0526428	0.134277	133.498	0.980869	20.1106	2.44513	265.475	23400	121.01	4.05417	41.6515	0.270081	50.5316	555.761	26.5089	117.021	1.0097	317.13	2.67271	29.2576	33.2077	174.029	2.07723	0.863393	0.0961304	11.159	172.783	53.0806	5.12876	57.9578	3.1713
48	0.204	n	0.694	p	positive	78.13	31	3	H	Huancabamba	0.0526428	0.134277	133.498	0.980869	40.3205	1.68659	227.385	23400	62.1284	7.34178	38.0553	0.270081	42.489	476.8	0.387573	120.199	1.41221	199.607	0.0816345	30.1149	33.2077	40.4601	2.50636	1.38739	0.0961304	8.2789	161.643	60.9854	5.12876	23.0517	2.35911
486	0.229	n	0.264333	n	negative	0	32	3	M	Los Ranchos	0.0526428	0.134277	139.655	2.20573	38.7991	3.47144	346.293	23400	75.0605	0.33493	45.0408	0.270081	62.5867	469.704	6.2312	0.0816345	0.0778198	458.521	0.0816345	31.0712	36.7989	184.618	2.39461	1.90262	0.0961304	22.203	186.422	101.286	4.69831	55.5162	2.95681
26	0.138	n	0.559333	p	negative	0	32	3	M	Guayaquil	0.0526428	0.134277	113.653	1.57387	29.941	6.43682	335.722	23400	138.465	1.47918	39.8702	0.270081	81.0865	974.663	58.9297	19.0377	2.60815	398.861	5.48497	28.4008	38.0487	318.201	2.07723	2.09024	0.0961304	26.875	161.643	86.803	4.26781	53.9399	3.2319
377	0.426	p	0.563333	p	negative	0	32	3	M	Tunal	0.0526428	0.134277	152.776	3.35027	47.7409	3.47107	324.897	23400	128.49	2.3546	41.6515	0.270081	93.1454	1045.69	0.387573	96.1641	1.41221	417.627	2.26889	35.2664	38.0487	180.352	3.37291	2.61962	0.0961304	16.6804	291.729	68.1438	5.99514	72.5718	3.82097
368	0.386	p	0.586667	p	negative	0	32	3	H	Tunal	74.8884	289.624	269.379	56.0528	79.3406	28.4756	329.308	5425.01	221.778	8.82858	208.023	1.11654	415.912	960.18	417.361	260.13	11.2124	1953.01	8.12191	26.6103	109.205	641.499	30.3207	36.1191	44.4568	27.0158	754.33	140.233	134.908	100.386	3.27969
42	0.335	n	0.989667	p	negative	0	32	3	M	Mayland	112.978	338.865	133.498	80.5986	27.6521	34.6835	234.792	23400	61.8669	0.33493	35.2629	26.7466	190.391	390.768	282.713	185.222	0.603954	436.24	3.17658	29.2576	35.6643	211.076	2.93839	36.8794	0.0961304	19.6386	183.857	130.544	5.12876	21.9182	3.30667
479	0.26	n	0.484333	n	negative	0	34	3	M	Los Ranchos	0.0526428	0.134277	295.617	12.1149	43.0787	0.96505	300.014	10911.2	104.258	3.58203	54.0529	2.59697	138.915	1053.38	10.9574	13.2645	0.696691	343.975	0.0816345	23.7656	23.2256	219.862	1.596	1.14598	0.0961304	33.4725	209.419	143.819	3.75549	111.708	3.50016
474	0.164	n	0.577667	p	negative	0	34	3	H	Los Ranchos	0.0526428	0.134277	139.655	2.20573	47.1388	3.37831	303.688	23400	87.835	0.33493	37.1536	0.270081	206.902	429.028	10.9574	35.6987	0.0778198	653.976	2.74593	31.0712	36.7989	258.976	1.99472	1.52432	0.0961304	20.4498	209.419	123.481	4.69831	45.1717	3.27621
499	0.219	n	0.616667	p	positive	208.8	34	3	H	Huancabamba	0.0526428	0.134277	133.498	0.980869	47.7409	2.19107	291.656	23400	105.482	3.21101	39.8702	0.270081	51.3358	455.887	0.387573	92.6049	1.0097	351.204	0.438247	28.4008	35.6643	198.953	2.50636	0.689598	0.0961304	19.1078	205.822	33.0734	6.86623	22.2956	3.07655
370	0.633	p	0.482	n	negative	0	35	3	M	Tunal	0.0526428	0.134277	162.164	21.6529	54.742	2.26228	275.417	6217.09	15.8436	0.33493	33.9829	9.49138	43.4505	204.125	29.3758	44.9525	0.696691	311.491	0.0816345	27.0163	34.2953	190.622	1.596	2.28089	0.0961304	15.2059	163.105	52.1742	6.11949	55.1007	3.20176
50	0.188	n	0.820667	p	negative	0	35	3	H	Huancabamba	0.0526428	0.134277	152.776	1.37628	47.7409	1.85416	269.139	23400	136.747	4.88717	39.8702	0.270081	138.961	815.552	0.387573	65.7998	1.0097	417.627	0.847996	32.689	33.2077	75.5103	2.93839	1.73832	0.0961304	16.5594	205.822	68.1438	5.12876	44.3817	2.92379
349	0.242	n	0.451	n	positive	0.01	35	3	M	Tunal	0.0526428	0.134277	152.776	5.71656	45.9423	0.860241	361.479	23400	89.2815	2.3546	46.8181	0.270081	129.316	656.969	0.387573	147.705	9.63635	282.369	0.0816345	36.1262	38.0487	102.537	4.24831	1.91417	0.0961304	11.159	183.857	60.9854	6.43014	45.7676	2.8938
363	0.23	n	0.336667	n	negative	0	36	3	M	Tunal	0.0526428	0.134277	143.201	1.37628	56.2823	2.53005	269.139	23400	95.5331	8.95065	43.4017	0.270081	84.3024	655.209	0.387573	204.298	1.0097	536.216	3.07588	33.5477	38.0487	263.397	2.50636	1.73832	0.0961304	14.0984	150.43	16.6888	5.99514	105.733	3.02917
458	0.355	p	0.358	n	negative	0	37	3	M	Huancabamba	0.0526428	0.134277	152.776	24.6726	25.2651	1.60305	321.284	23400	118.905	3.21101	46.8181	2.88884	175.927	772.589	34.6238	252.79	1.0097	322.038	0.540967	38.7076	35.6643	148.022	2.93839	1.73832	0.0961304	7.16472	216.721	83.9143	5.56132	55.9464	3.46911
455	0.337	n	0.599667	p	negative	0	37	3	M	Huancabamba	0.0526428	0.134277	133.498	1.7714	17.2744	1.43649	245.87	23400	180.858	3.21101	48.488	0.270081	40.0761	491.878	42.7314	158.736	1.0097	302.323	0.0816345	30.9725	33.2077	167.639	3.80963	2.09024	0.0961304	10.7753	259.835	102.849	6.86623	185.636	2.72121
491	0.412	p	0.641333	p	positive	10.44	37	3	M	Los Ranchos	0.0526428	0.134277	139.655	6.41362	96.3265	5.61704	282.815	23400	83.5057	0.33493	43.1353	0.679521	118.782	853.855	38.4265	25.0103	1.19805	468.639	2.5041	32.6908	39.2255	410.99	3.59954	2.84825	0.0961304	12.0625	254.615	81.1086	10.4186	65.1063	3.24204
422	0.259	n	0.36	n	negative	0	39	3	H	Los Ranchos	0.0526428	0.134277	115.478	14.0192	54.742	17.8171	288.967	23400	78.8002	4.48141	45.0408	4.13249	22.1529	540.541	38.4265	29.8548	4.46676	498.745	0.0816345	28.6393	36.7989	236.858	1.19872	1.90262	0.0961304	10.2671	287.927	63.4604	5.64494	77.7051	2.37603
469	0.387	p	0.66633	p	negative	0	39	3	M	Los Ranchos	0.0526428	0.134277	139.655	3.88677	66.8344	3.56458	336.596	23400	28.7879	0.33493	37.1536	0.572474	120.464	462.349	15.6182	24.392	2.63311	386.382	3.94094	27.0163	34.2953	178.555	1.99472	1.90262	0.0961304	21.1101	298.934	113.664	5.64494	45.1717	3.69929
425	0.316	n	0.249333	n	negative	0	40	3	M	Los Ranchos	0.0526428	0.134277	115.478	1.78608	38.7991	6.73877	294.495	23400	81.4323	0.33493	39.1961	0.270081	90.0126	376.385	15.6182	9.65336	0.0778198	333.216	0.0816345	25.3918	34.2953	127.484	1.596	1.14598	0.0961304	19.4401	220.812	78.7133	3.75549	62.8072	3.16454
398	0.22	n	0.55	p	negative	0	40	3	M	Tunal	0.0526428	0.134277	139.655	607.678	34.2458	2.63397	240.033	23400	37.9033	0.33493	43.1353	156.935	101.898	305.014	20.2351	29.5569	0.0778198	322.39	1.52351	28.6393	34.2953	147.242	1.596	1.90262	0.0961304	17.4755	151.31	63.4604	3.75549	22.2016	3.31213
32	0.476	p	0.574	p	negative	0	40	3	M	Tunal	0.0526428	0.134277	139.655	1.36677	40.9692	1.05745	231.276	23400	67.7491	7.11326	35.0551	0.270081	57.3949	277.36	6.2312	0.0816345	1.68511	255.793	0.0816345	31.8811	36.7989	113.798	1.99472	1.90262	0.0961304	10.0314	174.807	49.159	3.75549	29.0397	2.00669
5	0.333	n	0.299	n	positive	3.14	40	3	M	Guayaquil	0.0526428	0.134277	113.653	0.336456	36.3476	0.53737	265.475	23400	30.4606	0.33493	34.3116	0.270081	66.6143	430.886	0.387573	42.9648	1.81247	231.269	0.0816345	29.2576	35.6643	91.242	2.50636	0.344026	0.0961304	10.1392	172.783	60.9854	5.12876	23.8095	2.27703
407	0.291	n	0.348667	n	positive	11.62	40	3	M	Tunal	0.0526428	0.134277	162.164	3.4662	77.838	5.9908	325.05	23400	52.7577	0.33493	45.0408	0.270081	120.464	847.984	29.3758	60.1258	0.696691	672.845	0.0816345	33.5001	35.5573	342.58	2.79545	2.28089	0.0961304	37.5847	209.419	96.989	5.64494	105.293	3.48843
391	0.248	n	0.197667	n	negative	0	41	3	M	Tunal	0.0526428	0.134277	113.653	5.71656	22.7604	1.43649	249.554	23400	57.9556	0.33493	38.0553	0.693164	93.9493	244.226	0.387573	79.062	0.603954	365.619	0.0816345	30.5436	38.0487	186.611	1.65155	1.73832	0.0961304	10.3367	194.868	60.9854	5.12876	18.3557	3.52326
49	0.218	n	0.735667	p	negative	0	41	3	H	Huancabamba	0.0526428	0.134277	133.498	2.95572	32.1462	2.10663	276.456	23400	95.2604	2.3546	34.3116	0.270081	81.8905	455.887	0.387573	101.104	1.0097	272.294	0.0816345	31.8305	38.0487	120.611	2.50636	1.73832	0.0961304	20.6832	200.352	112.607	4.26781	28.0052	3.36759
39	0.19	n	0.524667	p	negative	0	43	3	M	Tunal	0.0526428	0.134277	113.653	2.16632	14.1843	3.72962	259.36	23400	42.1482	2.3546	43.4017	0.270081	73.0466	354.753	26.5089	24.1761	1.0097	473.038	0.847996	31.8305	33.2077	339.352	2.07723	1.03767	0.0961304	4.37864	216.721	16.6888	4.26781	17.0544	2.5671
8	0.307	n	0.316667	n	positive	0.35	43	3	M	Guayaquil	0.0526428	0.134277	133.498	2.95572	29.941	7.14388	248.326	23400	12.9269	3.21101	41.6515	0.270081	68.2224	238.703	0.387573	0.0816345	1.0097	177.982	0.0816345	31.8305	33.2077	58.7571	1.65155	1.38739	0.0961304	5.26676	139.138	0.0587463	3.41331	8.34151	2.974
495	0.166	n	0.336333	n	positive	0.84	43	3	M	Los Ranchos	0.0526428	0.134277	162.164	3.88677	49.0988	3.47144	339.023	23400	41.8669	0.33493	45.0408	0.270081	165.578	429.028	20.2351	28.058	3.0979	343.975	0.0816345	33.5001	34.2953	247.99	3.19713	1.90262	0.0961304	42.3835	490.837	885.395	5.64494	433.005	3.09685
364	0.205	n	0.302667	n	positive	11.85	43	3	H	Tunal	0.0526428	0.134277	113.653	18.3443	29.941	1.77029	223.676	23400	159.635	5.71195	39.8702	2.25247	85.1063	580.3	0.387573	62.4663	0.0778198	331.812	1.25554	35.2664	30.6684	186.611	2.07723	1.03767	0.0961304	17.3992	227.569	146.941	4.26781	46.1641	4.18898
380	0.352	p	0.622667	p	negative	0	44	3	M	Tunal	0.0526428	0.134277	115.478	1.36677	54.742	1.52015	245.648	23400	87.9673	0.33493	39.1961	0.270081	90.0126	735.188	8.60464	13.2645	0.0778198	528.499	0.0816345	24.5789	26.1917	166.241	1.19872	1.52432	0.0961304	21.5179	197.958	46.0473	3.75549	48.059	2.67399
500	0.232	n	0.629667	p	negative	0	44	3	H	Huancabamba	0.0526428	0.134277	93.0965	2.95572	32.1462	11.7991	230.473	23400	56.3322	0.33493	32.375	0.270081	105.203	530.973	0.387573	38.1761	1.0097	379.931	0.0816345	30.9725	34.4456	323.526	2.07723	0.689598	0.0961304	37.1016	205.822	190.28	4.26781	23.8095	2.96827
46	0.367	p	0.817	p	negative	0	44	3	H	Huancabamba	0.0526428	0.134277	133.498	0.980869	22.7604	4.1621	294.689	23400	78.3208	1.47918	38.0553	0.270081	105.203	521.726	0.387573	89.9775	0.603954	454.707	0.0816345	30.9725	33.2077	67.285	2.50636	1.91417	0.0961304	7.84145	216.721	60.9854	5.12876	44.7773	3.1019
466	0.224	n	0.243333	n	negative	0	45	3	M	Tunal	0.0526428	0.134277	115.478	1.78608	23.9299	14.0542	244.402	23400	58.3053	0.33493	41.1884	0.270081	53.9232	442.958	15.6182	47.951	0.0778198	255.793	2.98671	31.8811	34.2953	130.837	1.99472	3.03736	0.0961304	12.0625	220.812	147.36	4.69831	25.6111	2.59002
53	0.204	n	0.210667	n	positive	0.55	45	3	M	Huancabamba	0.0526428	0.134277	115.478	2.41565	29.3359	9.54811	232.529	8214.37	31.5393	0.33493	38.1814	0.270081	46.9517	137.658	0.387573	17.3512	0.0778198	719.577	0.0816345	29.4502	34.2953	208.313	1.39716	1.14598	0.0961304	16.4293	209.419	39.4758	3.75549	18.4168	1.68159
496	0.309	n	0.472333	n	positive	4	46	3	H	Los Ranchos	0.0526428	0.134277	139.655	24.8406	51.0173	7.3001	209.256	8445.87	88.4972	3.58203	39.1961	1.56405	104.437	695.574	20.2351	54.8982	0.696691	508.701	1.77101	33.5001	36.7989	382.119	1.596	1.52432	0.0961304	13.4256	243.406	109.617	4.69831	107.002	3.7305
134	0.201	n	0.35	n	positive	5.35	46	3	M	Mayland	0.0526428	0.134277	113.653	2.56107	22.7604	1.2707	222.438	23400	112.898	0.33493	35.2629	0.270081	61.7898	518.945	0.387573	22.9147	0.603954	172.502	0.0816345	38.2772	30.6684	40.4601	2.07723	1.73832	0.0961304	12.2326	183.857	146.941	4.26781	32.6312	2.825
3	0.141	n	0.689667	p	positive	6.8	46	3	M	Guayaquil	0.0526428	0.134277	152.776	0.980869	6.54185	2.7855	270.36	23400	57.5007	1.47918	36.2036	0.270081	39.2717	276.797	0.387573	19.6946	0.603954	251.936	0.847996	34.4069	33.2077	83.4836	2.50636	2.44298	0.0961304	8.11605	172.783	0.0587463	5.12876	36.3255	1.96316
17	0.272	n	0.383667	n	positive	60.11	46	3	M	Guayaquil	0.0526428	0.134277	113.653	2.95572	27.6521	1.68659	238.489	23400	69.3561	0.33493	30.3887	0.693164	110.026	530.973	0.387573	9.93992	1.41221	241.643	0.0816345	30.1149	30.6684	205.04	2.07723	1.38739	0.0961304	8.49394	161.643	16.6888	5.12876	16.3138	2.53026
429	0.435	p	0.405667	n	negative	0	47	3	M	Los Ranchos	0.0526428	0.134277	88.8492	1.36677	49.0988	0.075531	254.361	8566.83	55.5715	0.33493	39.1961	0.270081	62.5867	218.643	20.2351	37.9819	0.0778198	396.839	0.0816345	26.2042	34.2953	1.61743	1.596	1.90262	0.0961304	15.7763	174.807	52.1742	4.69831	57.5954	2.41049
413	0.36	p	0.543	p	negative	0	47	3	H	Tunal	0.0526428	0.134277	497.026	0.947881	14.1817	6.17773	230.65	23400	36.6348	0.33493	35.0551	0.270081	64.3134	422.504	0.387573	8.13373	0.0778198	311.491	0.0816345	31.0712	34.2953	199.526	1.596	1.14598	0.0961304	13.7303	209.419	32.2937	2.81741	28.8375	1.25384
345	0.267	n	0.508	n	negative	0	48	3	H	Tunal	0.0526428	0.134277	133.498	2.16632	51.2417	3.38505	365.659	23400	119.116	2.78473	48.488	0.270081	105.203	1394.86	34.6238	174.08	1.21128	426.952	10.2724	42.1539	42.6325	506.719	3.37291	2.44298	0.0961304	16.3163	312.809	112.607	6.86623	162.412	3.13254
352	0.215	n	0.752667	p	negative	0	48	3	H	Tunal	0.0526428	0.134277	152.776	1.37628	29.941	1.93817	223.057	23400	48.272	4.88717	43.4017	0.270081	63.398	347.655	0.387573	137.403	0.807329	262.151	1.86429	36.5562	28.0332	285.681	2.93839	2.09024	0.0961304	9.63806	216.721	102.849	5.12876	48.9459	4.05717
35	0.254	n	0.185667	n	negative	0	49	3	M	Tunal	82.4857	233.35	676.021	222.895	213.177	26.5204	692.674	23400	144.937	141.743	351.279	88.9341	489.193	1486.37	521.782	124.035	72.5695	2407.06	20.5749	35.2664	313.936	2443.4	46.3976	30.655	153.024	34.3104	2391.04	259.846	560.379	103.427	2.91937
20	0.367	p	0.249667	n	negative	0	49	3	M	Guayaquil	0.0526428	0.134277	115.478	1.78608	34.2458	1.89098	263.048	23400	73.4303	0.33493	35.0551	0.270081	62.5867	614.395	6.2312	3.10353	0.0778198	135.762	0.0816345	30.2609	31.7034	92.2816	1.596	1.52432	0.0961304	11.7368	151.31	63.4604	6.59477	13.2911	2.62441
27	0.247	n	0.356333	n	positive	0.03	49	3	M	Tunal	0.0526428	0.134277	113.653	1.37628	20.1106	1.77029	326.703	23400	57.4357	13.6873	38.0553	0.270081	27.2052	318.919	0.387573	0.0816345	1.0097	341.533	0.0816345	30.1149	30.6684	91.242	2.07723	1.03767	0.0961304	17.2405	183.857	60.9854	5.12876	49.145	2.68153
417	0.181	n	0.378	n	negative	0	50	3	M	Tunal	0.0526428	0.134277	115.478	0.336456	20.9646	1.7055	332.346	10522.8	35.584	9.67728	43.1353	0.270081	46.9517	364.962	6.2312	0.0816345	0.0778198	221.228	0.0816345	24.5789	31.7034	60.9288	1.596	1.14598	0.0961304	31.5096	192.2	96.989	4.69831	25.6111	1.47285
7	0.58	p	0.500333	n	negative	0	51	3	M	Guayaquil	0.0526428	0.134277	113.653	12.0267	24.0289	1.43649	333.318	23400	79.9923	1.47918	36.2036	1.61689	52.14	594.731	0.387573	14.6396	1.0097	210.258	0.0816345	30.1149	33.2077	30.3801	2.07723	1.03767	0.0961304	14.2707	172.783	86.803	4.26781	11.921	2.34218
408	0.231	n	0.583	p	positive	3.32	51	3	H	Tunal	0.0526428	0.134277	0.804138	2.20573	0.292969	4.59006	175.517	467.057	54.0164	0.33493	11.3394	0.270081	38.1768	374.485	0.387573	0.0816345	0.0778198	122.778	0.0816345	0.173187	2.4394	1.61743	0.102234	0.166321	0.0961304	28.2128	31.3282	147.36	0.650024	16.4373	0.247758
13	0.239	n	0.335667	n	positive	6.47	51	3	M	Guayaquil	0.0526428	0.134277	133.498	0.336456	22.7604	4.85774	286.799	23400	61.9976	0.33493	30.3887	0.270081	48.9232	440.54	0.387573	26.0429	2.21101	199.607	0.0816345	38.7076	30.6684	67.285	2.07723	1.03767	0.0961304	19.5631	205.822	44.0595	3.41331	23.0517	3.28311
468	0.263	n	0.316	n	negative	0	52	3	M	Los Ranchos	0.0526428	0.134277	139.655	1.78608	36.5609	2.81994	244.402	23400	90.6274	0.33493	41.1884	0.270081	126.347	865.579	10.9574	58.0459	0.696691	375.869	0.0816345	28.6393	36.7989	52.3694	1.99472	1.90262	0.0961304	16.9791	163.105	46.0473	4.69831	42.9086	3.55371
498	0.38	p	0.329667	n	negative	0	52	3	H	Los Ranchos	0.0526428	0.134277	139.655	500.694	38.7991	2.44808	218.087	23400	109.568	0.33493	54.0529	81.2619	109.509	478.872	6.2312	43.0238	0.696691	381.133	0.0816345	25.3918	39.2255	166.241	2.39461	1.71348	0.0961304	23.6616	197.958	292.129	3.75549	76.8623	3.48407
21	0.322	n	0.352667	n	negative	0	52	3	M	Guayaquil	0.0526428	0.134277	133.498	1.7714	32.1462	15.2506	282.543	23400	64.0926	1.47918	43.4017	0.270081	90.7337	532.818	0.387573	19.0377	1.0097	611.145	0.0816345	33.5477	28.0332	237.654	1.65155	1.03767	0.0961304	23.2791	216.721	206.573	4.26781	29.3495	2.59856
418	0.208	n	0.608667	p	positive	8.39	52	3	H	Tunal	0.0526428	0.134277	57.9652	0.947881	17.7508	0.075531	205.462	23400	52.4156	0.33493	35.0551	0.270081	90.0126	305.014	0.387573	0.0816345	0.0778198	221.228	0.0816345	30.2609	31.7034	219.862	0.803357	0.956792	0.0961304	11.071	133.421	78.7133	2.35059	27.6258	1.45574
477	0.31	n	0.643	p	positive	106.9	52	3	M	Los Ranchos	92.0743	98.5551	115.478	125.491	55.6518	39.1664	340.235	23400	112.007	0.33493	45.0408	5.15671	120.464	1041.19	816.231	64.2446	2.16266	644.501	3.94094	30.2609	38.0212	269.826	1.99472	38.5771	0.0961304	40.105	298.934	324.994	3.75549	107.215	4.3036
472	0.174	n	0.484333	n	positive	217.11	52	3	H	Los Ranchos	0.0526428	0.134277	115.478	2.20573	51.962	0.075531	216.827	9732.31	173.89	0.33493	39.1961	0.270081	76.35	556.681	0.387573	93.7699	0.0778198	278.331	0.0816345	32.6908	39.2255	84.7825	1.596	1.52432	0.0961304	24.5097	232.139	871.383	4.69831	57.5954	4.29787
427	0.266	n	0.521	n	negative	0	54	3	M	Los Ranchos	0.0526428	0.134277	139.655	1.36677	88.0554	3.28521	339.629	23400	126.606	0.33493	45.0408	0.270081	143.929	916.384	0.387573	35.4112	0.696691	438.151	0.0816345	29.4502	41.5841	147.242	1.99472	2.65914	0.0961304	92.6696	260.199	297.11	4.69831	89.1202	4.64514
25	0.269	n	0.262667	n	positive	0.76	54	3	H	Guayaquil	0.0526428	0.134277	115.478	1.36677	43.0787	6.55172	202.929	7277.95	130.248	0.33493	35.0551	0.270081	79.7743	1543.77	8.60464	22.8322	0.696691	255.793	0.0816345	30.2609	34.2953	127.484	1.99472	1.52432	0.0961304	16.7968	186.422	214.175	4.69831	63.016	2.91695
354	0.312	n	0.297667	n	positive	25.97	54	3	M	Tunal	0.0526428	0.134277	162.164	1.78608	40.9692	3.7509	274.182	23400	64.8385	0.33493	37.1536	0.270081	141.423	581.649	10.9574	109.016	0.696691	289.466	0.0816345	29.4502	36.7989	84.7825	1.99472	1.90262	0.0961304	16.1976	209.419	83.4686	4.69831	35.3342	2.75269
15	0.374	p	0.552667	p	negative	0	55	3	H	Guayaquil	0.0526428	0.134277	113.653	0.336456	29.941	1.93817	238.489	23400	48.785	3.21101	39.8702	0.270081	60.1816	355.764	0.387573	19.0377	1.81247	302.323	0.0816345	30.9725	28.0332	49.8533	1.65155	1.38739	0.0961304	17.4783	238.369	68.1438	4.26781	13.74	3.61078
430	0.299	n	0.575	p	negative	0	56	4	H	Los Ranchos	0.0526428	0.134277	88.8492	1.57638	65.183	3.93728	279.734	23400	64.3569	0.33493	43.1353	0.270081	135.568	359.23	6.2312	25.6256	0.696691	333.216	0.0816345	27.0163	34.2953	134.165	1.596	1.52432	0.0961304	33.0031	163.105	96.989	4.69831	42.0868	4.50133
424	0.224	n	0.382333	n	negative	0	57	4	H	Los Ranchos	0.0526428	0.134277	183.436	2.41565	65.183	3.00599	268.62	23400	129.562	0.33493	39.1961	0.270081	48.6983	1455.27	24.8187	8.51866	0.696691	322.39	0.0816345	31.4762	36.7989	150.457	1.596	2.65914	0.0961304	22.0025	331.695	505.265	4.69831	137.74	2.91749
348	0.187	n	0.46	n	positive	101.33	57	4	H	Tunal	0.0526428	0.134277	133.498	1.7714	20.1106	5.64508	269.139	23400	71.7366	4.4718	39.8702	0.270081	101.988	558.5	0.387573	119.746	0.603954	220.81	1.35719	33.5477	33.2077	148.022	2.50636	1.03767	0.0961304	9.78953	194.868	0.0587463	5.12876	25.3299	2.79228
482	0.482	p	0.219333	n	negative	0	58	4	H	Los Ranchos	0.0526428	0.134277	57.9652	1.36677	49.0988	2.07658	209.256	4378.55	129.03	0.33493	32.8939	0.270081	105.283	1078.51	10.9574	9.65336	0.0778198	375.869	0.0816345	13.5564	34.2953	216.992	1.19872	0.767587	0.0961304	22.9573	151.31	57.9564	3.75549	87.0013	3.97693
14	0.326	n	0.330667	n	positive	0.008	58	4	H	Guayaquil	0.0526428	0.134277	93.0965	1.37628	14.1843	2.02233	196.327	23400	56.2674	4.88717	36.2036	0.270081	155.034	923.68	0.387573	20.3469	1.0097	231.269	0.0816345	25.8328	38.0487	67.285	2.07723	1.21236	0.0961304	9.0737	194.868	92.3772	3.41331	11.921	3.01619
372	0.234	n	0.321333	n	negative	0	59	4	H	Tunal	0.0526428	0.134277	162.164	0.947881	54.742	6.08426	212.414	23400	62.5601	3.58203	43.1353	0.270081	66.0381	380.181	15.6182	22.5177	0.696691	289.466	8.2362	31.8811	31.7034	60.9288	1.99472	2.28089	0.0961304	15.3017	220.812	73.8083	4.69831	44.7599	4.3036
470	0.244	n	0.413667	n	negative	0	59	3	M	Los Ranchos	0.0526428	5.08244	139.655	1.36677	71.662	22.8116	209.888	8197.75	77.3357	3.58203	45.9791	0.270081	132.218	1018.38	24.8187	21.2506	15.6138	478.715	0.0816345	30.2609	36.7989	236.858	2.39461	2.28089	0.0961304	21.2736	197.958	63.4604	4.69831	67.6183	3.61505
353	0.546	p	0.478333	n	negative	0	59	4	M	Tunal	0.0526428	0.134277	133.498	281.18	141.019	5.29457	327.305	23400	68.5642	3.21101	39.8702	60.9083	103.596	675.376	26.5089	130.751	28.5368	336.679	0.643477	33.1183	38.0487	198.953	2.93839	2.79642	11.5913	15.9488	259.835	183.518	5.99514	89.8764	2.27482
473	0.203	n	0.257667	n	negative	0	60	4	H	Los Ranchos	0.0526428	0.134277	242.116	1.78608	51.0173	4.49677	279.118	23400	84.5486	0.33493	39.1961	0.270081	141.423	802.481	6.2312	25.6256	0.696691	386.382	3.82235	37.5425	36.7989	196.571	1.99472	1.90262	0.0961304	17.9652	254.615	73.8083	4.69831	54.2702	3.41158
54	0.403	p	0.617	p	positive	5.28	60	4	H	Huancabamba	0.0526428	0.134277	139.655	1.36677	49.0988	0.075531	269.239	23400	161.526	0.33493	37.1536	0.270081	72.9194	556.681	15.6182	16.013	0.0778198	244.379	0.0816345	30.2609	34.2953	77.0815	2.79545	1.90262	0.0961304	10.8445	174.807	253.304	4.69831	51.3677	4.26922
478	0.387	p	0.673667	p	negative	0	61	4	H	Los Ranchos	0.0526428	0.134277	115.478	37.8421	4.53345	6.27122	273.564	23400	63.6365	0.33493	37.1536	3.77448	59.1276	316.748	15.6182	18.6689	0.0778198	244.379	0.0816345	27.0163	30.37	196.571	1.19872	1.52432	0.0961304	25.0425	197.958	14.3167	2.81741	10.9513	1.7412
428	0.444	p	0.282	n	negative	0	62	4	M	Los Ranchos	0.0526428	0.134277	139.655	3.04581	40.9692	8.61096	424.302	23400	61.667	0.33493	41.1884	0.841912	29.3183	607.338	0.387573	0.0816345	0.696691	528.499	0.0816345	27.828	34.2953	69.1452	1.99472	1.52432	0.0961304	48.4481	186.422	143.819	5.64494	118.139	1.65587
378	0.362	p	0.394	n	negative	0	62	4	M	Tunal	0.0526428	0.134277	133.498	1.37628	64.2235	1.35349	417.928	23400	116.945	2.3546	39.8702	0.270081	109.222	618.013	0.387573	2.33303	1.41221	370.401	0.0816345	27.1163	38.0487	98.8139	2.2914	1.91417	0.0961304	18.4166	227.569	121.804	5.12876	48.7469	2.37941
405	0.266	n	0.628333	p	negative	0	63	4	M	Tunal	0.0526428	0.134277	115.478	1.78608	23.9299	5.9908	236.909	23400	78.8641	0.33493	35.0551	0.270081	66.0381	328.416	6.2312	0.0816345	1.19805	232.859	0.0816345	30.2609	34.2953	140.748	1.596	0.767587	0.0961304	19.5252	215.124	78.7133	4.69831	27.2223	2.25758
381	0.227	n	0.802667	p	negative	0	63	4	M	Tunal	0.0526428	0.134277	133.498	29.8231	32.1462	1.43649	294.083	23400	97.3084	3.21101	39.8702	6.96084	143.783	829.758	0.387573	73.616	1.41221	331.812	0.0816345	31.8305	40.3692	269.018	2.93839	2.44298	0.0961304	30.1038	205.822	121.804	5.99514	61.388	3.19594
29	0.304	n	0.564667	p	positive	20.93	64	4	M	Tunal	0.0526428	0.134277	133.498	1.37628	40.3205	2.87086	294.689	23400	78.9222	3.21101	41.6515	0.270081	80.2826	529.127	0.387573	0.0816345	2.21101	231.269	0.0816345	36.1262	35.6643	106.221	2.50636	2.09024	0.0961304	11.0158	205.822	97.7149	5.99514	55.5447	1.69528
359	0.184	n	0.25	n	negative	0	66	4	H	Tunal	0.0526428	0.134277	133.498	6.11087	61.1086	3.81596	264.253	23400	147.25	0.33493	41.6515	2.54162	73.0466	1312.58	0.387573	72.1168	2.60815	536.216	0.540967	28.8291	44.8442	186.611	2.50636	1.56272	0.0961304	27.3733	249.123	262.615	5.12876	58.7637	2.55421
16	0.187	n	0.355667	n	negative	0	67	4	M	Guayaquil	0.0526428	0.134277	133.498	0.336456	34.2788	1.93817	211.898	23400	102.107	2.3546	36.2036	0.270081	50.5316	565.788	0.387573	1.80858	1.0097	231.269	0.0816345	32.689	30.6684	40.4601	2.07723	1.03767	0.0961304	8.91719	150.43	33.0734	4.26781	17.7972	1.93482
453	0.45	p	0.467667	n	positive	3.4	68	4	H	Huancabamba	0.0526428	0.134277	133.498	0.336456	42.2353	0.617506	218.722	23400	71.4717	3.21101	36.2036	0.270081	92.3415	511.511	30.5674	20.6715	1.0097	166.989	0.0816345	28.4008	30.6684	109.869	2.93839	3.15048	0.0961304	9.94	172.783	44.0595	4.26781	20.4131	2.98856
389	0.235	n	0.480667	n	negative	0	68	4	M	Tunal	0.0526428	0.134277	93.0965	5.71656	32.1462	22.9846	304.379	23400	105.206	2.3546	39.8702	0.270081	142.175	710.993	26.5089	140.266	1.0097	351.204	2.26889	35.2664	35.6643	274.605	3.80963	1.03767	0.0961304	13.7513	222.151	219.064	6.86623	82.8421	4.75062
342	0.155	n	0.413333	n	positive	11.03	68	4	M	Tunal	0.0526428	0.134277	133.498	2.16632	38.3595	3.81596	353.706	23400	124.601	3.21101	48.488	0.270081	176.731	895.903	34.6238	172.811	1.0097	436.24	0.0816345	34.8366	38.0487	211.076	3.37291	2.44298	0.0961304	19.3739	249.123	367.589	6.86623	64.4254	3.34128
475	0.221	n	0.704333	p	negative	0	70	5	H	Los Ranchos	0.0526428	0.134277	88.8492	1.78608	77.838	4.68336	261.809	23400	66.6533	3.58203	39.1961	0.270081	95.1137	583.426	24.8187	28.9592	0.696691	458.521	0.0816345	28.6393	31.7034	99.6043	1.99472	1.52432	0.0961304	20.4914	232.139	101.286	4.69831	61.972	3.20782
101	0.227	n	0.314	n	positive	23.42	70	5	H	Mayland	0.0526428	0.134277	71.5928	2.16632	17.2744	1.18812	212.519	6941.35	109.979	3.21101	32.375	0.270081	142.979	630.467	0.387573	58.5744	1.81247	282.369	0.0816345	21.5623	30.6684	117.062	2.07723	1.03767	0.0961304	11.4902	194.868	228.159	3.41331	31.857	2.28045
386	0.251	n	0.445667	n	negative	0	73	5	H	Tunal	0.0526428	0.134277	203.74	1.78608	61.81	4.40349	264.907	23400	139.766	4.48141	45.0408	0.270081	55.6602	1012.67	15.6182	98.2711	2.16266	478.715	2.98671	25.3918	41.5841	166.241	2.79545	1.90262	0.0961304	15.1097	220.812	302.05	8.50235	31.2673	3.01961
350	0.186	n	0.478667	n	negative	0	73	5	H	Tunal	0.0526428	0.134277	113.653	1.37628	27.6521	3.64335	270.36	23400	83.8835	1.47918	39.8702	0.270081	76.2627	363.832	0.387573	81.7567	0.0778198	379.931	0.0816345	30.1149	35.6643	154.64	2.07723	0.689598	0.0961304	28.1636	172.783	474.974	4.26781	45.5694	4.51565
100	0.234	n	0.315667	n	positive	0.01	73	5	M	Mayland	0.0526428	0.134277	88.8492	3.4662	47.1388	2.54101	260.569	5346.64	47.3512	0.33493	37.1536	0.270081	105.283	1704.21	10.9574	25.6256	0.0778198	267.108	0.0816345	26.2042	31.7034	92.2816	0.803357	0.767587	0.0961304	15.3017	209.419	236.931	3.75549	126.738	2.39338
480	0.174	n	0.356667	n	negative	0	77	5	H	Los Ranchos	0.0526428	0.134277	139.655	1.36677	26.7074	2.72694	234.407	23400	122.706	0.33493	43.1353	0.270081	72.9194	712.839	20.2351	9.65336	0.696691	354.668	0.0816345	33.5001	34.2953	140.748	1.596	1.14598	0.0961304	35.9755	127.4	171.066	4.69831	68.2469	1.91578
384	0.189	n	0.299	n	negative	0	78	5	M	Tunal	0.0526428	0.134277	115.478	1.36677	40.9692	2.63397	317.13	23400	176.22	0.33493	40.1982	0.270081	79.7743	892.286	0.387573	55.9512	0.0778198	375.869	0.0816345	27.828	34.2953	99.6043	1.596	1.33516	0.0961304	30.3349	174.807	157.738	3.75549	43.1141	3.72477
379	0.198	n	0.561333	p	negative	0	84	5	M	Tunal	0.0526428	0.134277	139.655	4.30753	73.2323	7.0194	349.924	23400	88.5635	0.33493	39.1961	0.270081	162.255	738.618	0.387573	38.5484	1.44298	691.612	6.51291	34.3091	31.7034	312.021	1.99472	1.90262	0.0961304	83.983	342.534	407.793	6.11949	82.3475	3.41496
385	0.146	n	0.222667	n	negative	0	90	5	H	Tunal	0.0526428	0.134277	113.653	0.980869	8.75232	1.2707	263.642	8229.91	98.1975	1.47918	30.3887	0.270081	40.8804	357.785	0.387573	30.2965	9.63635	199.607	0.0816345	26.2605	22.3969	75.5103	1.65155	0.689598	0.0961304	12.324	104.706	251.436	3.41331	33.9891	1.65013
465	0.264	n	0.387333	n	negative	0	94	5	M	Tunal	23.5658	22.9665	139.655	26.3295	40.9692	9.17317	256.846	4280.17	56.9051	0.33493	48.7409	4.37221	55.6602	252.31	104.801	95.1956	1.92489	498.745	6.28153	36.7345	36.7989	357.558	1.596	5.68451	0.0961304	23.1932	364.1	161.122	3.75549	35.3342	2.24404
476	0.244	n	0.577667	p	negative	0	-		H	Los Ranchos	0.0526428	0.134277	139.655	0.947881	79.3406	0.872706	279.734	23400	58.1298	0.33493	43.1353	0.270081	158.93	708.529	15.6182	44.678	1.68511	468.639	0.0816345	27.0163	36.7989	106.771	1.99472	2.28089	0.0961304	59.2802	232.139	121.55	69.4823	55.724	4.42389
